# Supplementary material for: Comprehensive Analysis of Gut Microbiota and Fecal Bile Acid Profiles in Children With Biliary Atresia
Source: PubMed Central journal article supplement (PMC9247268; doi:10.3389/fcimb.2022.914247), 2022-06-17

# Supplementary Figure 1

A

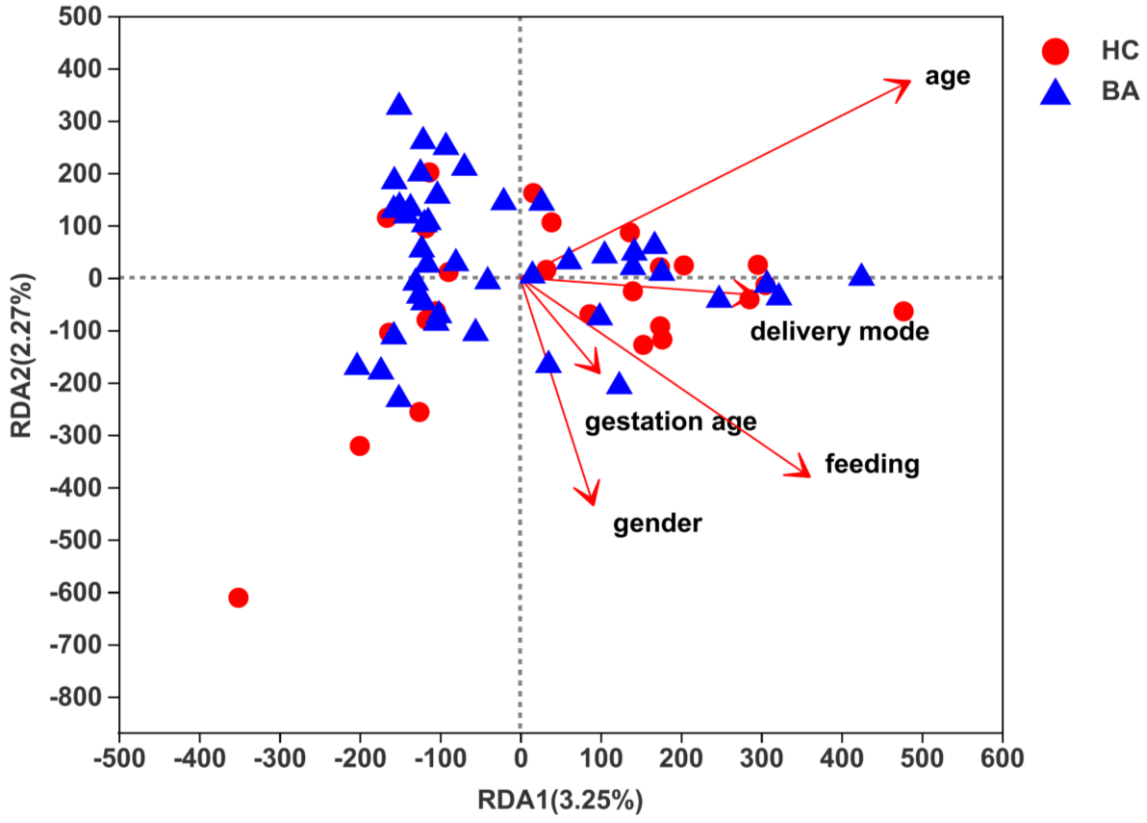

# Supplementary Figure 2

**A**

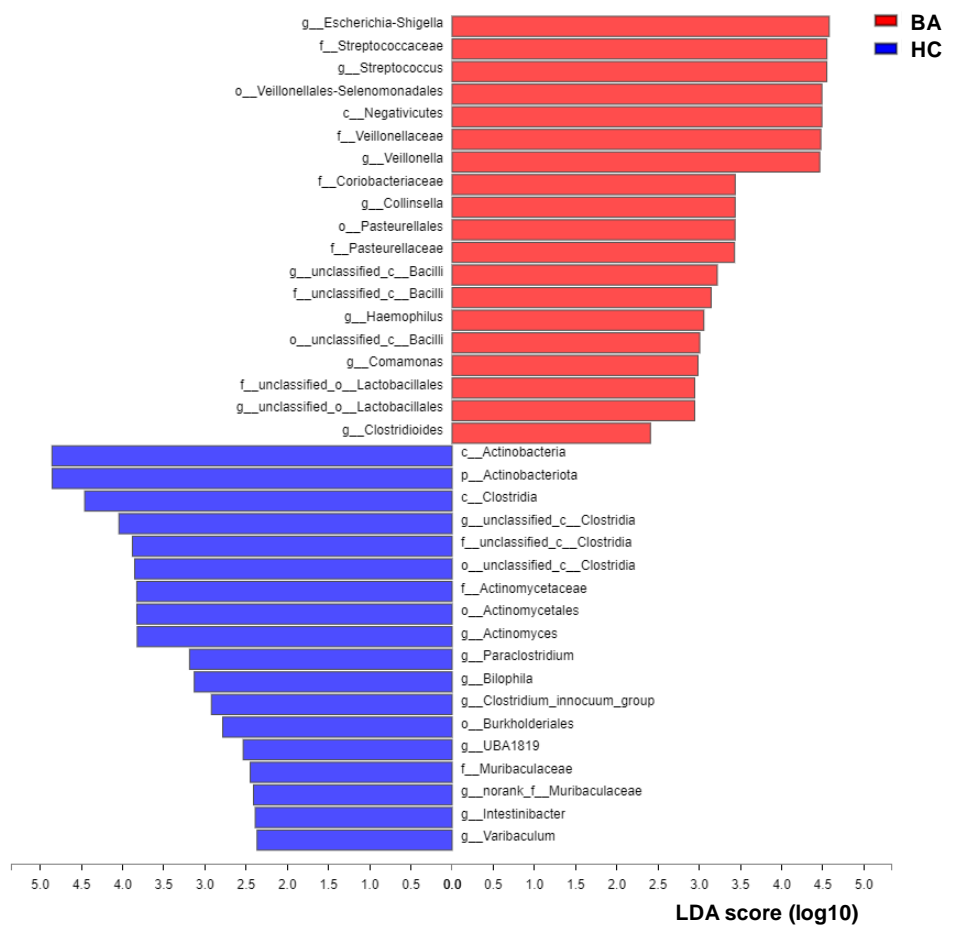

**B**

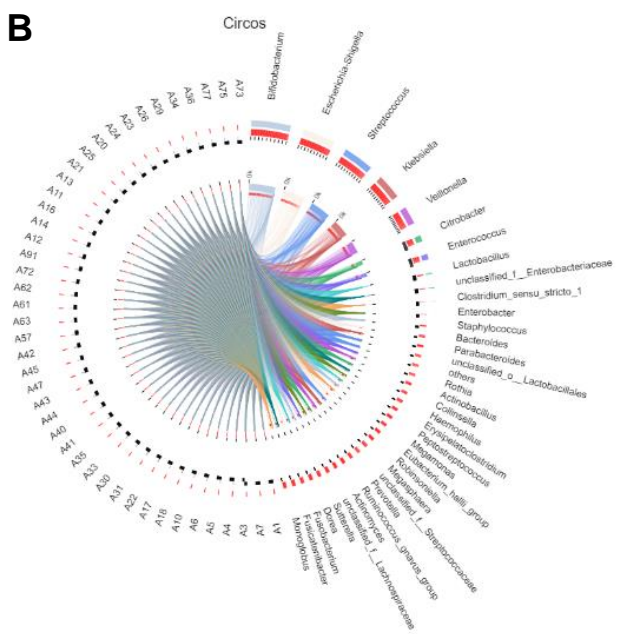

**C**

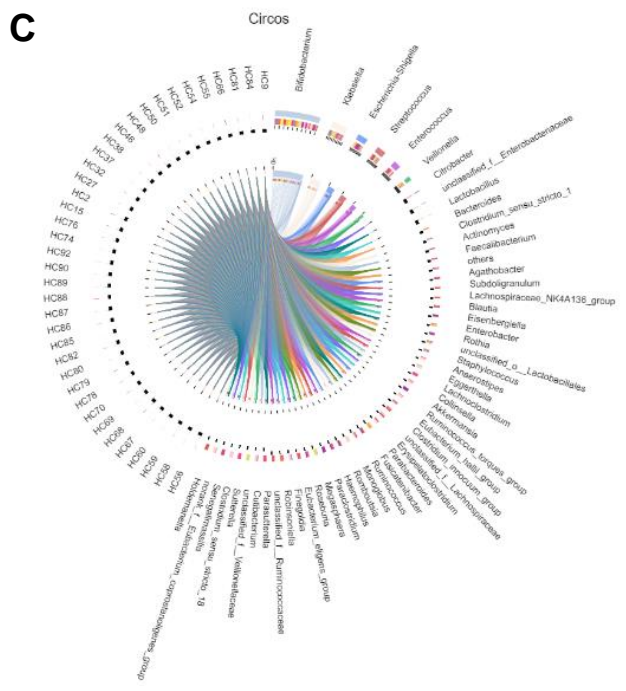

# Supplementary Figure 3

**A**

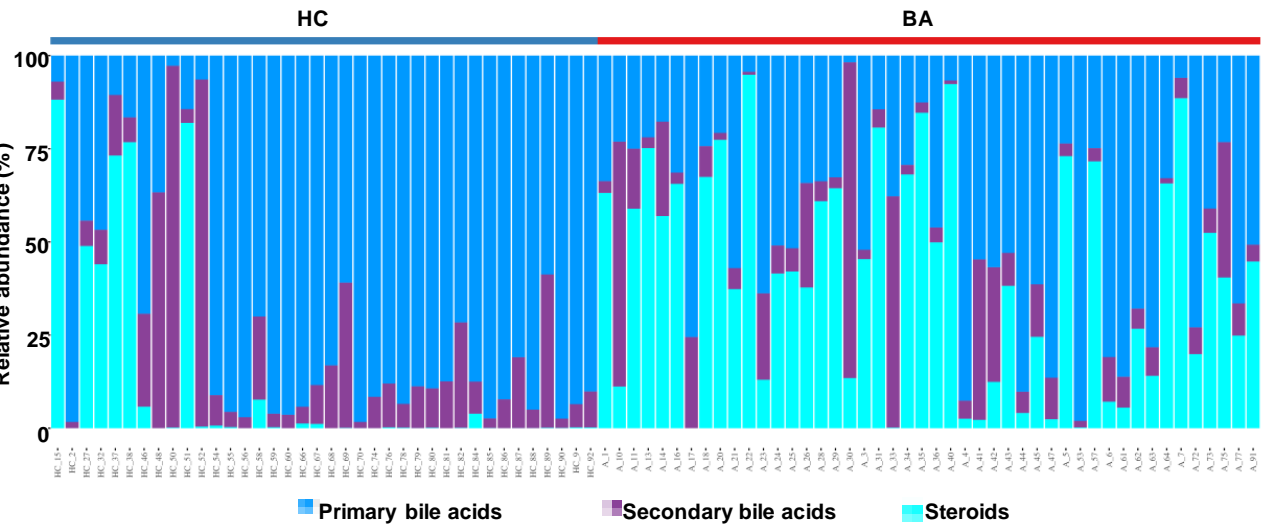

**B**

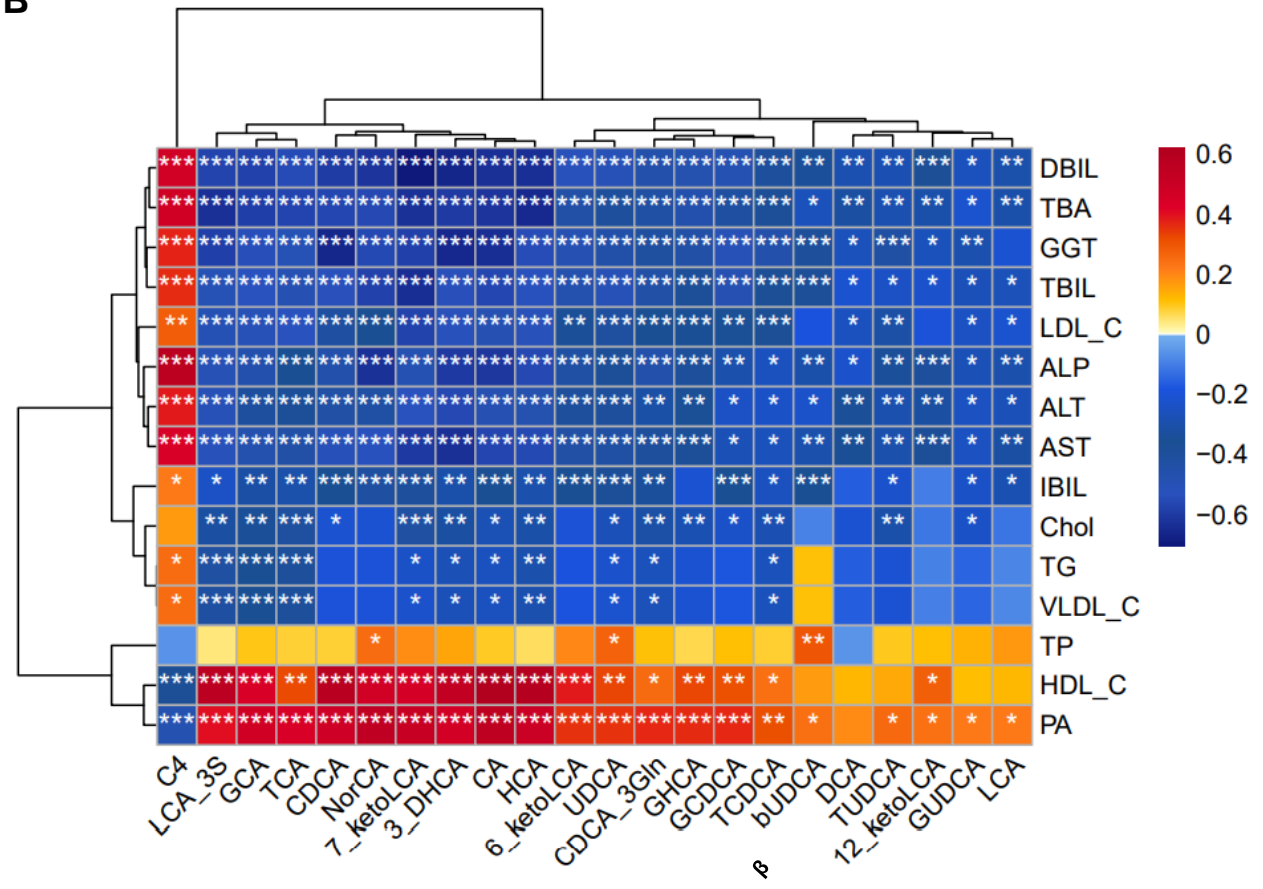

Supplement: Image_1.pdf [file Image_1.pdf]
